# Supplementary material for: When can ionic liquids be considered readily biodegradable? Biodegradation pathways of pyridinium, pyrrolidinium and ammonium-based ionic liquids
Source: Royal Society of Chemistry journal article supplement (doi:10.1039/c4gc01904k), 2014-11-27
Supplement: c4gc01904k1.pdf [file c4gc01904k1.pdf]

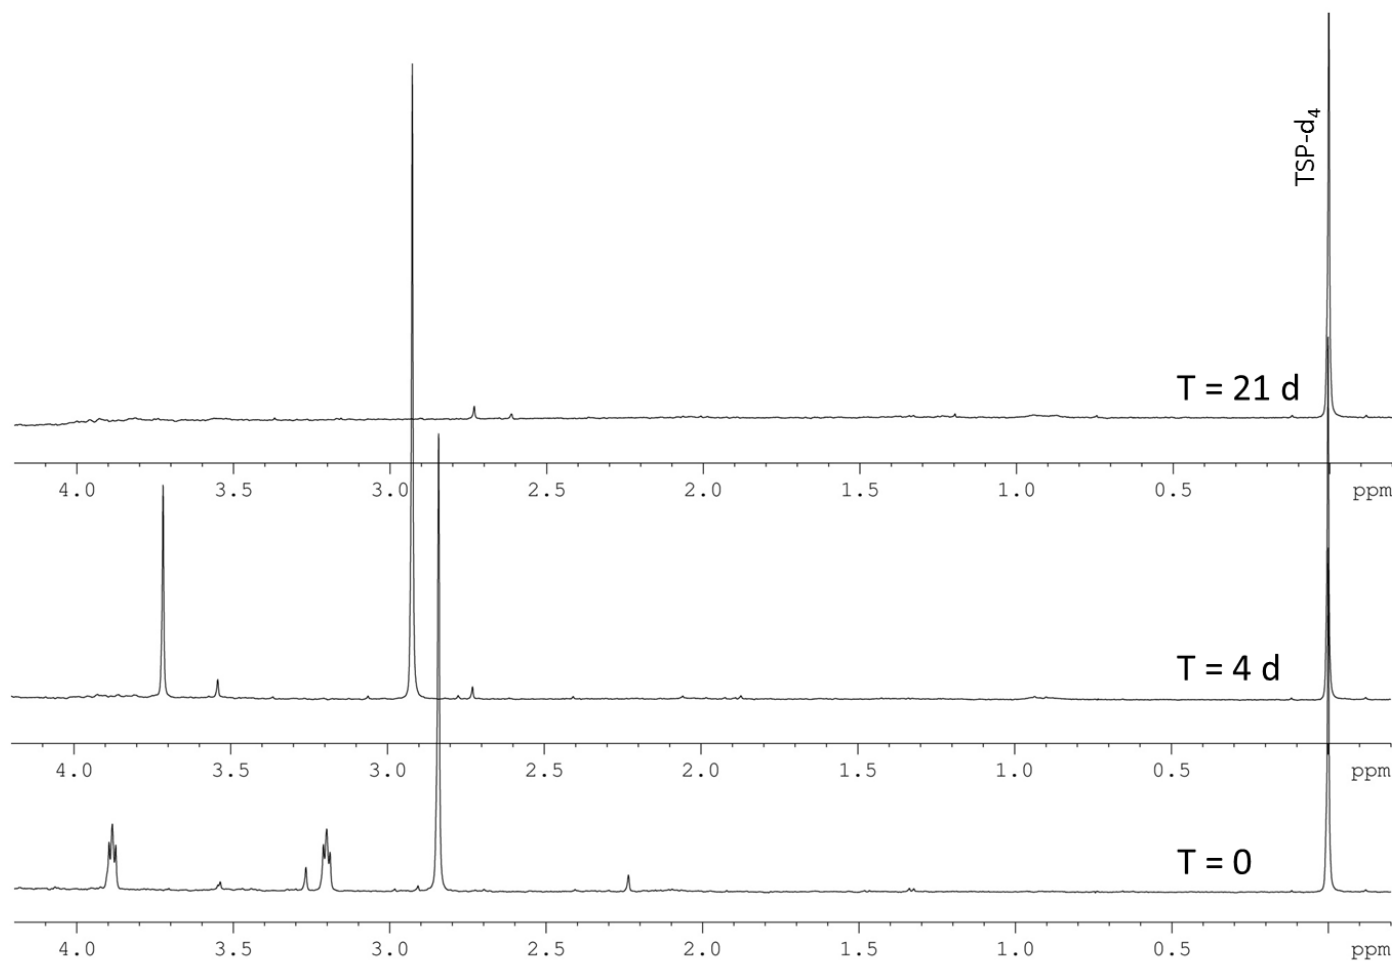

**Fig. 1**  $^1\text{H}$  NMR spectra recorded during the biodegradation of 1 mM  $[\text{NH}_{1120\text{H}}][\text{Ac}]$  by *Rhodococcus rhodochrous* ATCC 29672.

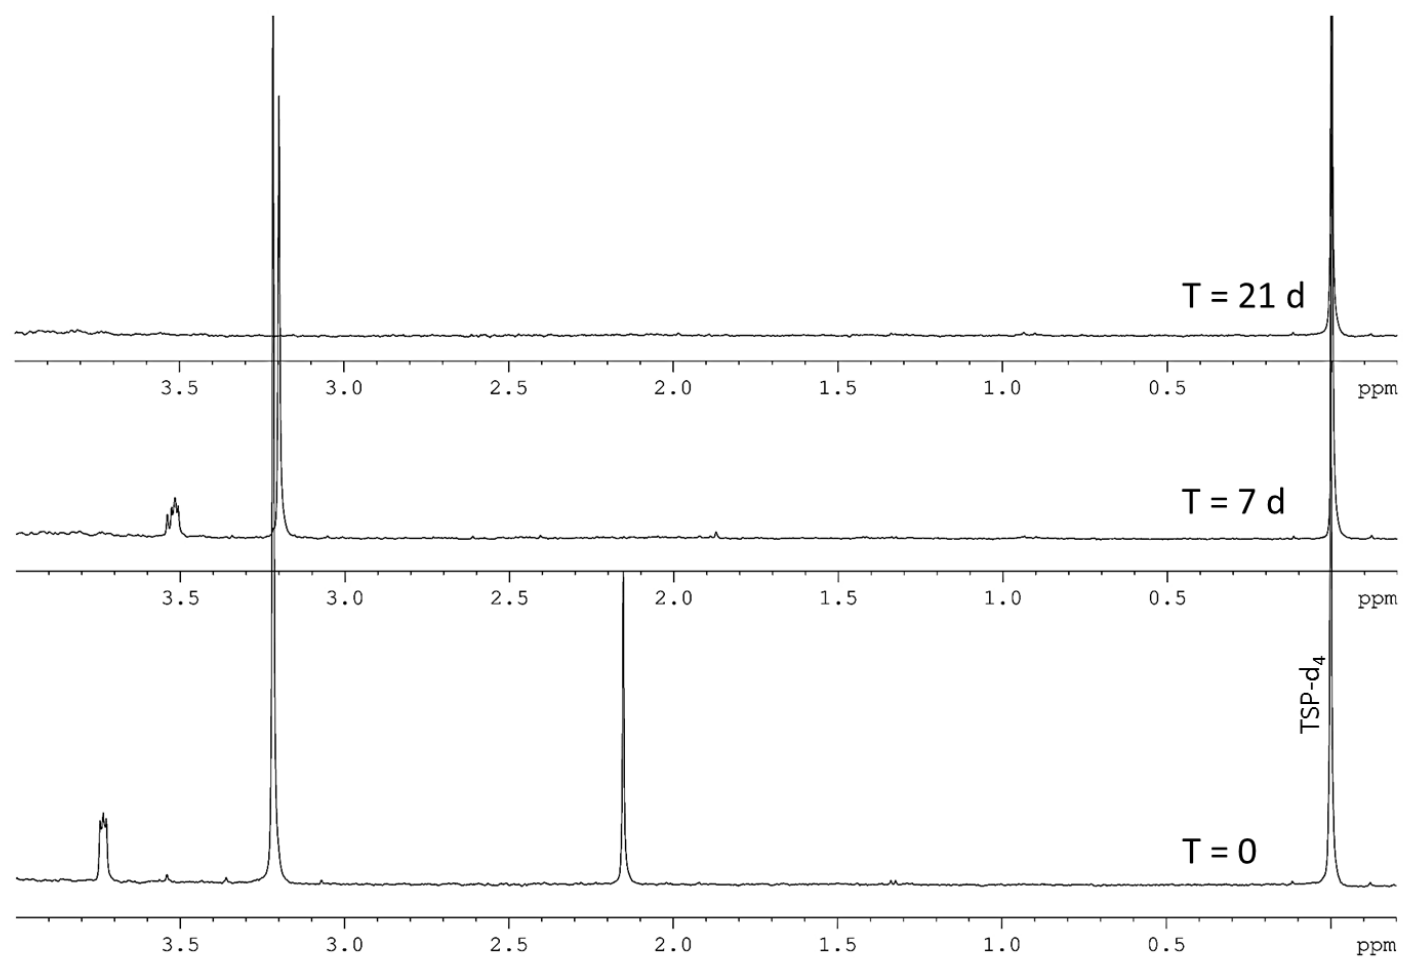

**Fig. 2**  $^1\text{H}$  NMR spectra recorded during the biodegradation of 1 mM  $[\text{N}_{1112}\text{OCOCH}_3][\text{Tf}_2\text{N}]$  by *Rhodococcus rhodochrous* ATCC 29672.

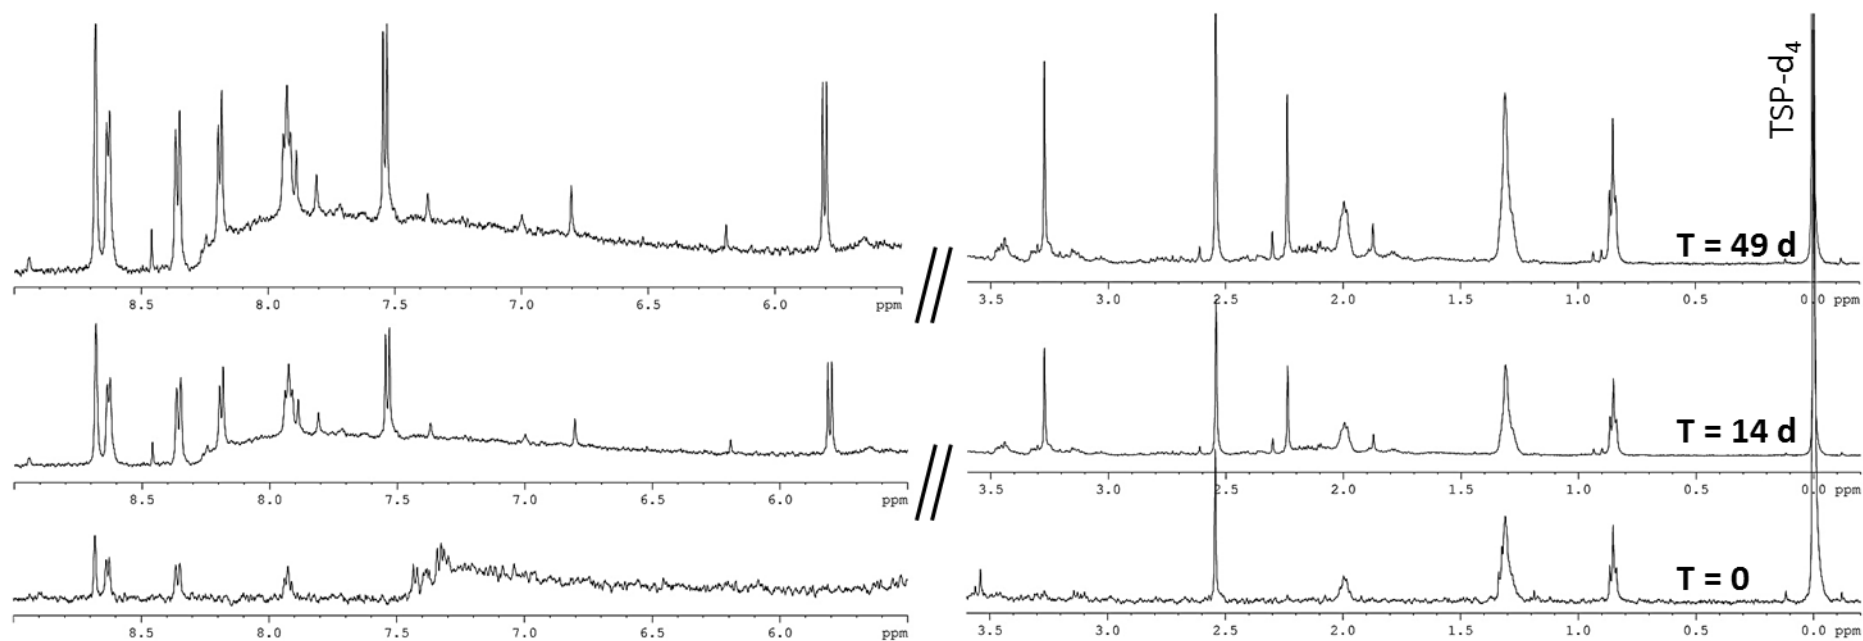

**Fig. 3**  $^1\text{H}$  NMR spectra recorded during the biodegradation of 1 mM  $[\text{C}_6\text{mPy}][\text{Tf}_2\text{N}]$  by *Rhodococcus rhodochrous* ATCC 29672.

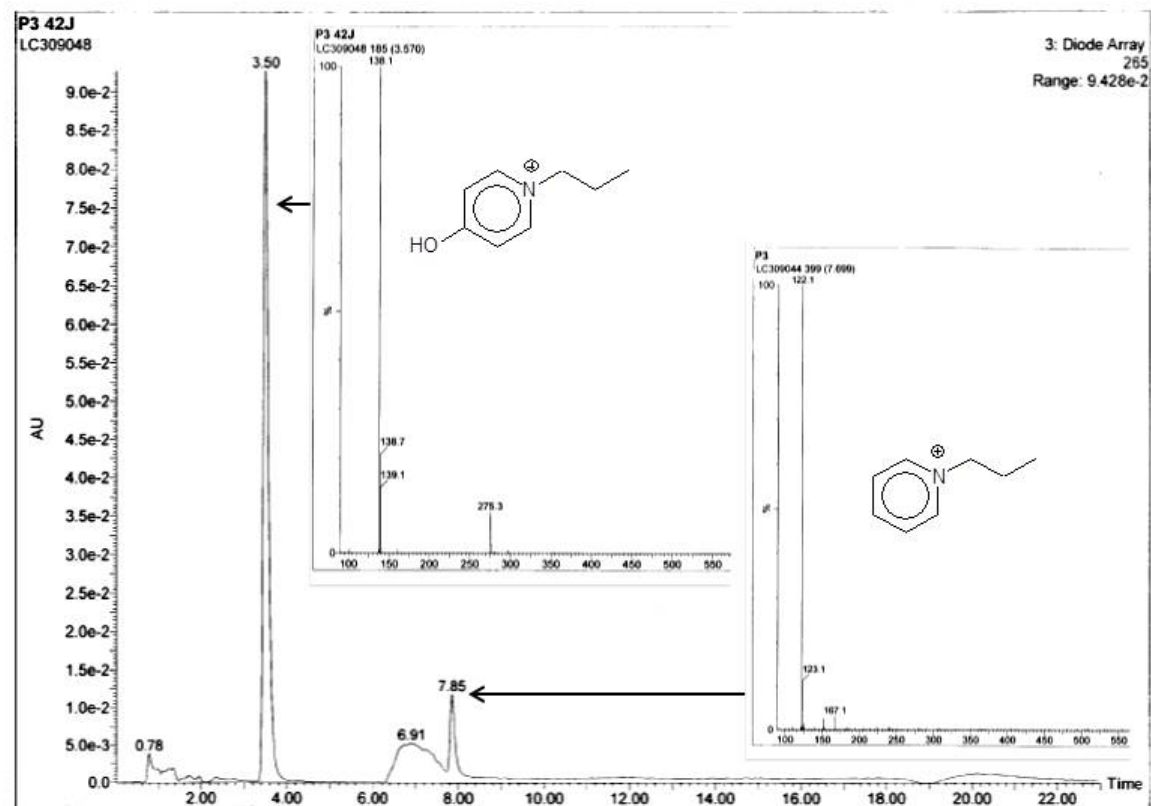

Fig. 4 LC-(+)-ESI-MS spectra of  $[C_3Py][Tf_2N]$  and its metabolite

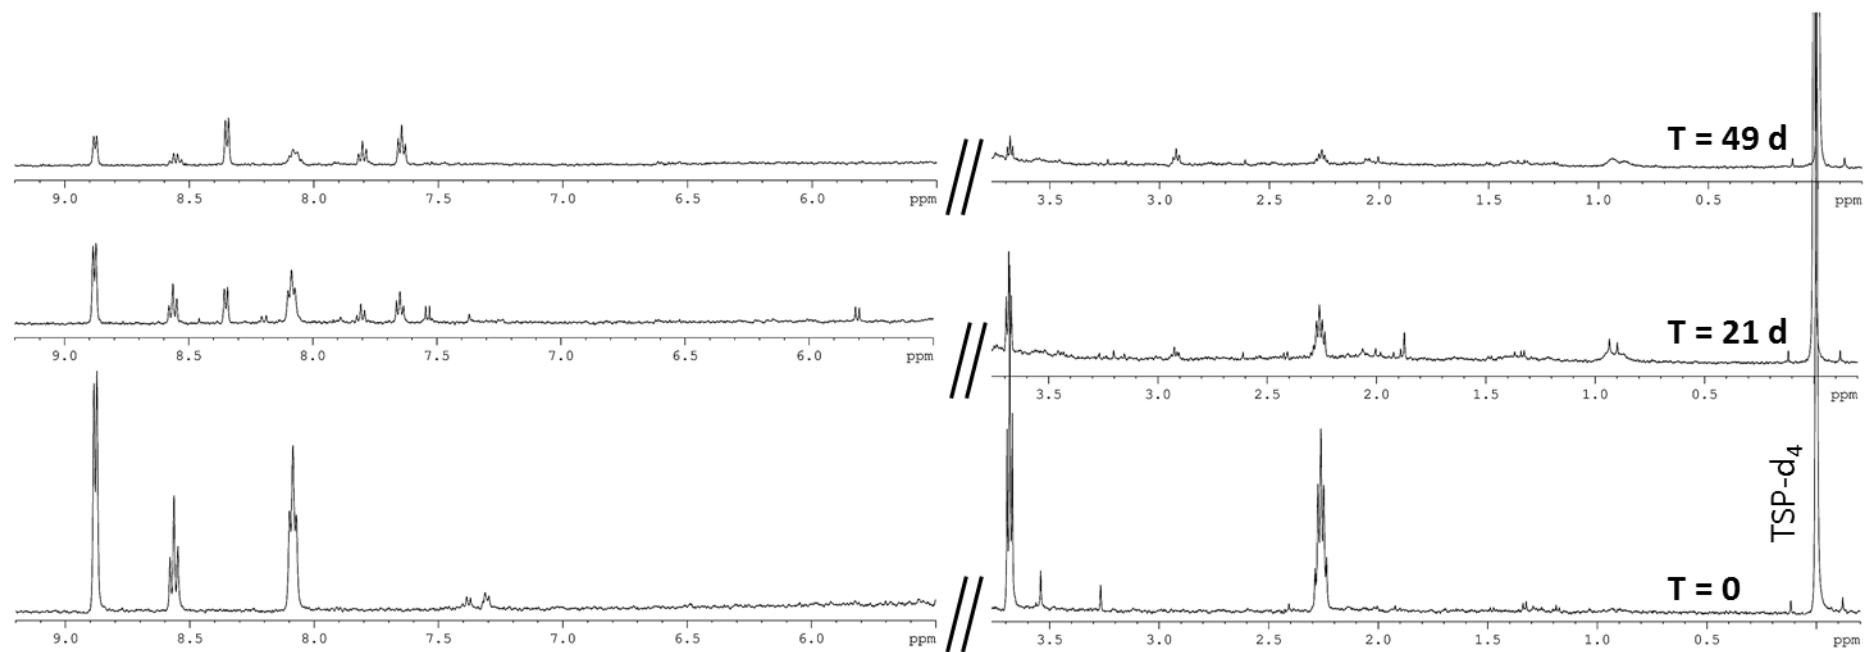

**Fig. 5**  $^1\text{H}$  NMR spectra recorded during the biodegradation of 1 mM  $[\text{C}_{30}\text{H}_5\text{Py}][\text{Tf}_2\text{N}]$  by *Rhodococcus rhodochrous* ATCC 29672.

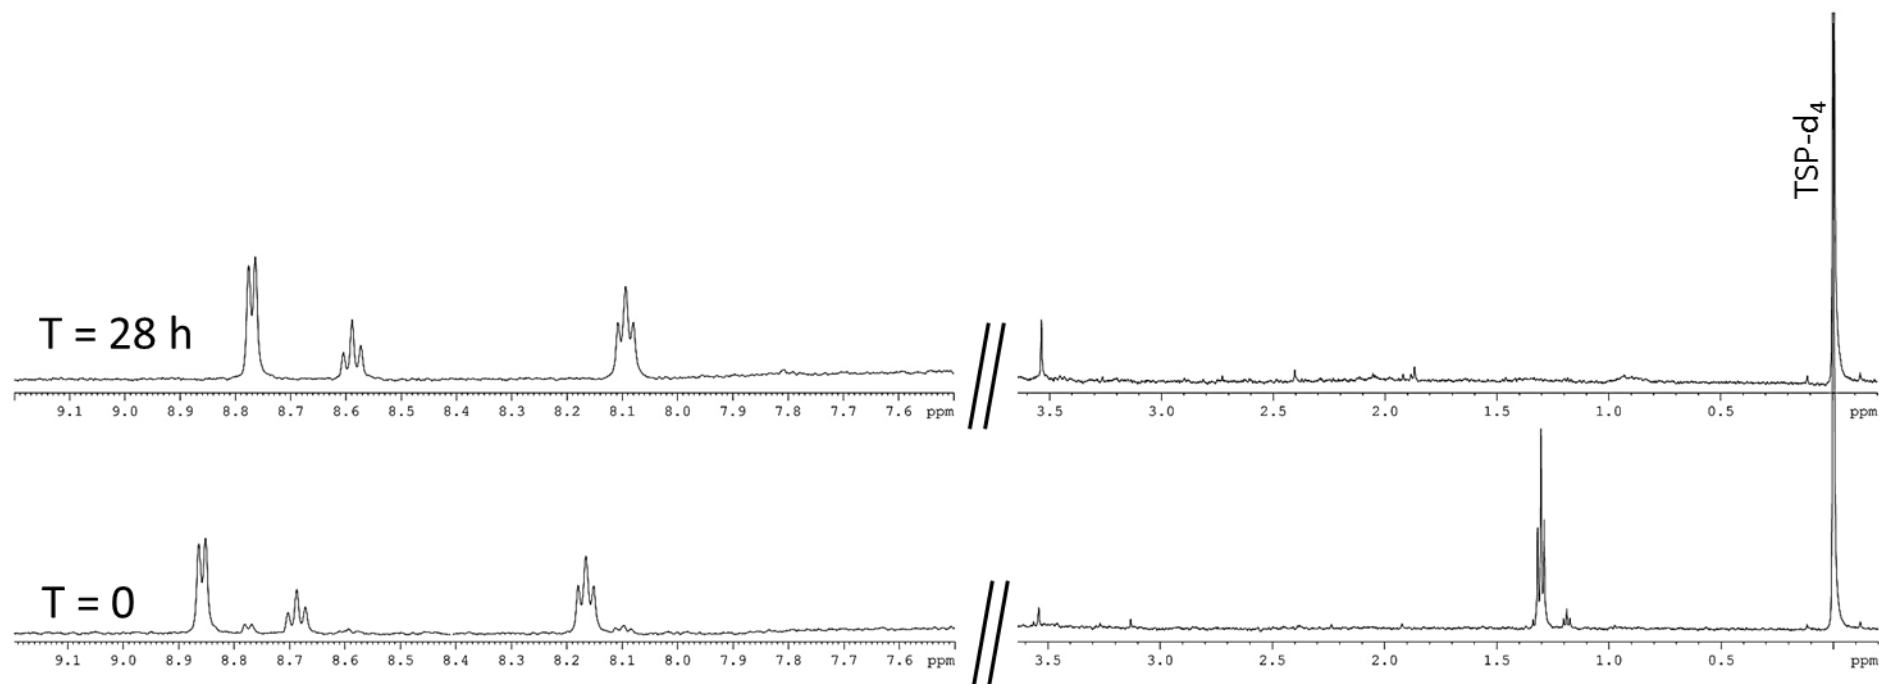

**Fig. 6**  $^1\text{H}$  NMR spectra recorded during the biodegradation of  $1\text{ mM } [\text{C}_{10}\text{COOCH}_2\text{Py}][\text{Tf}_2\text{N}]$  by *Rhodococcus rhodochrous* ATCC 29672.
